# Supplementary material
Source: bioRxiv or medRxiv preprint supplement (https://www.biorxiv.org/highwire/filestream/59432/field_highwire_adjunct_files/1/195545-2.pdf)

## Supplementary Figures

Figure S 1: Spectrum plots of  $\log_{10}(\text{MAFs})$  for simulated genotypes.

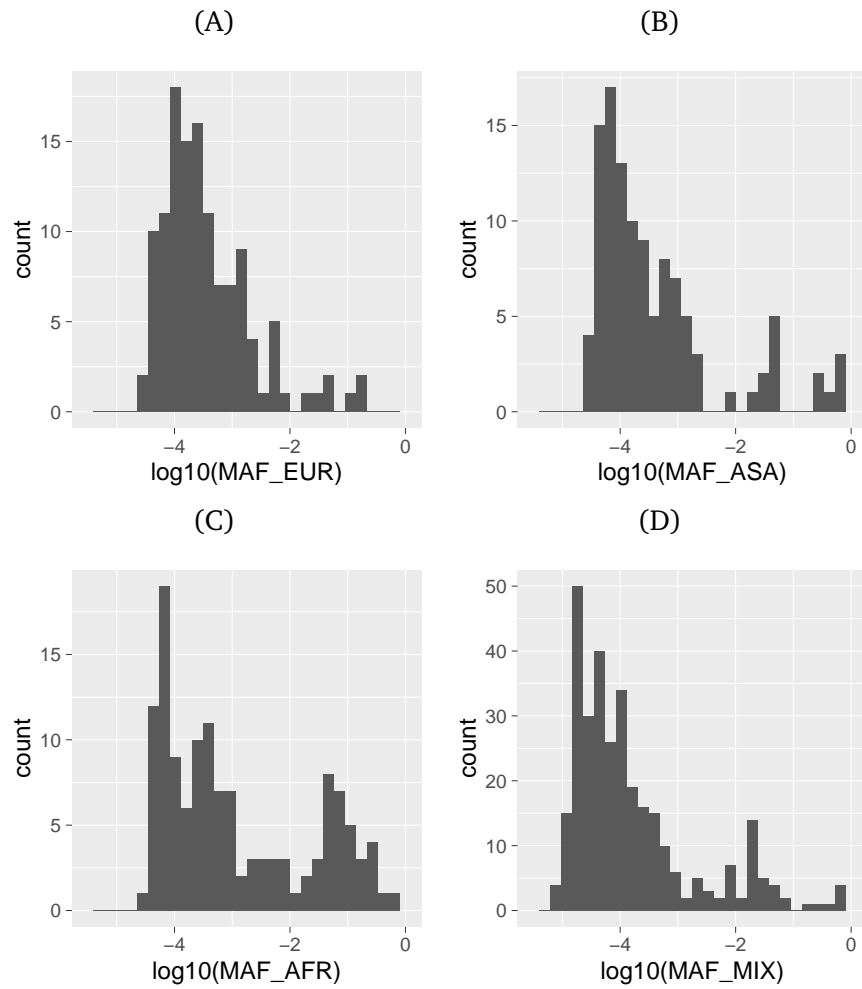

(A) European (EUR); (B) Asian (ASA); (C) African (AFR); (D) Mixed populations (MIX) of EUR, ASA, and AFR.

**Figure S 2:** Empirical type I errors of meta-Burden test and meta-SKAT with different significance levels ( $\alpha = 0.01, 10^{-4}, 2.5 \times 10^{-6}$ ), for balanced (B) and unbalanced (UB) **dichotomous** studies without population stratifications.

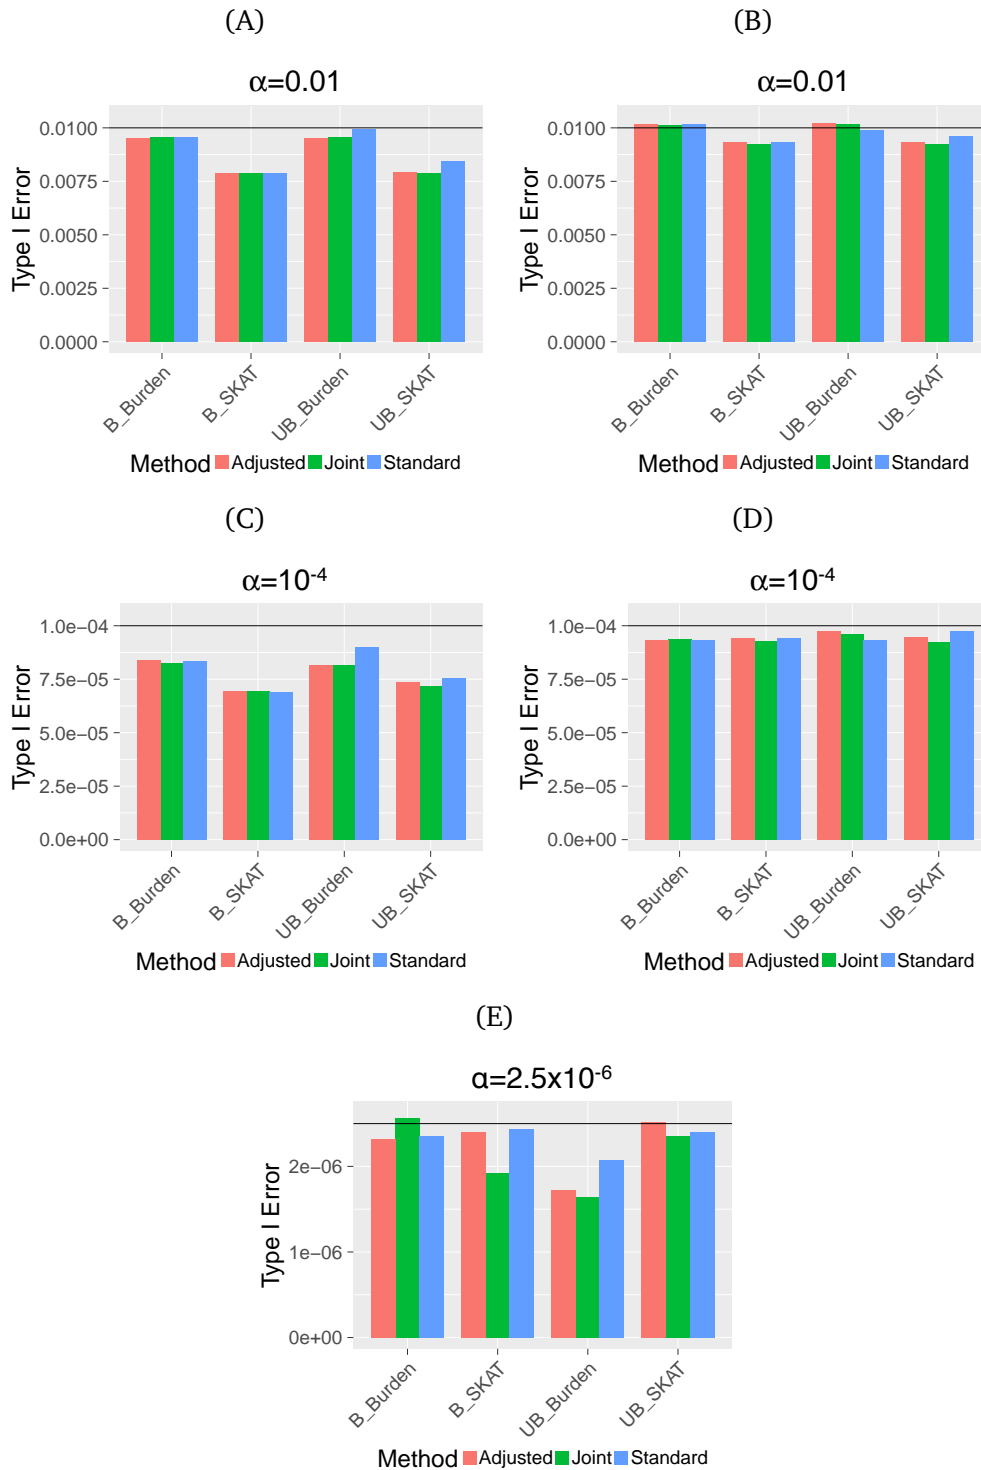

(A, C): Scenarios with common covariates; (B, D, E) Scenarios with different covariates.

**Figure S 3:** Empirical type I errors of meta-Burden test and meta-SKAT with different significance levels ( $\alpha = 0.01, 10^{-4}, 2.5 \times 10^{-6}$ ), for balanced (B) and unbalanced (UB) **quantitative** studies without population stratifications.

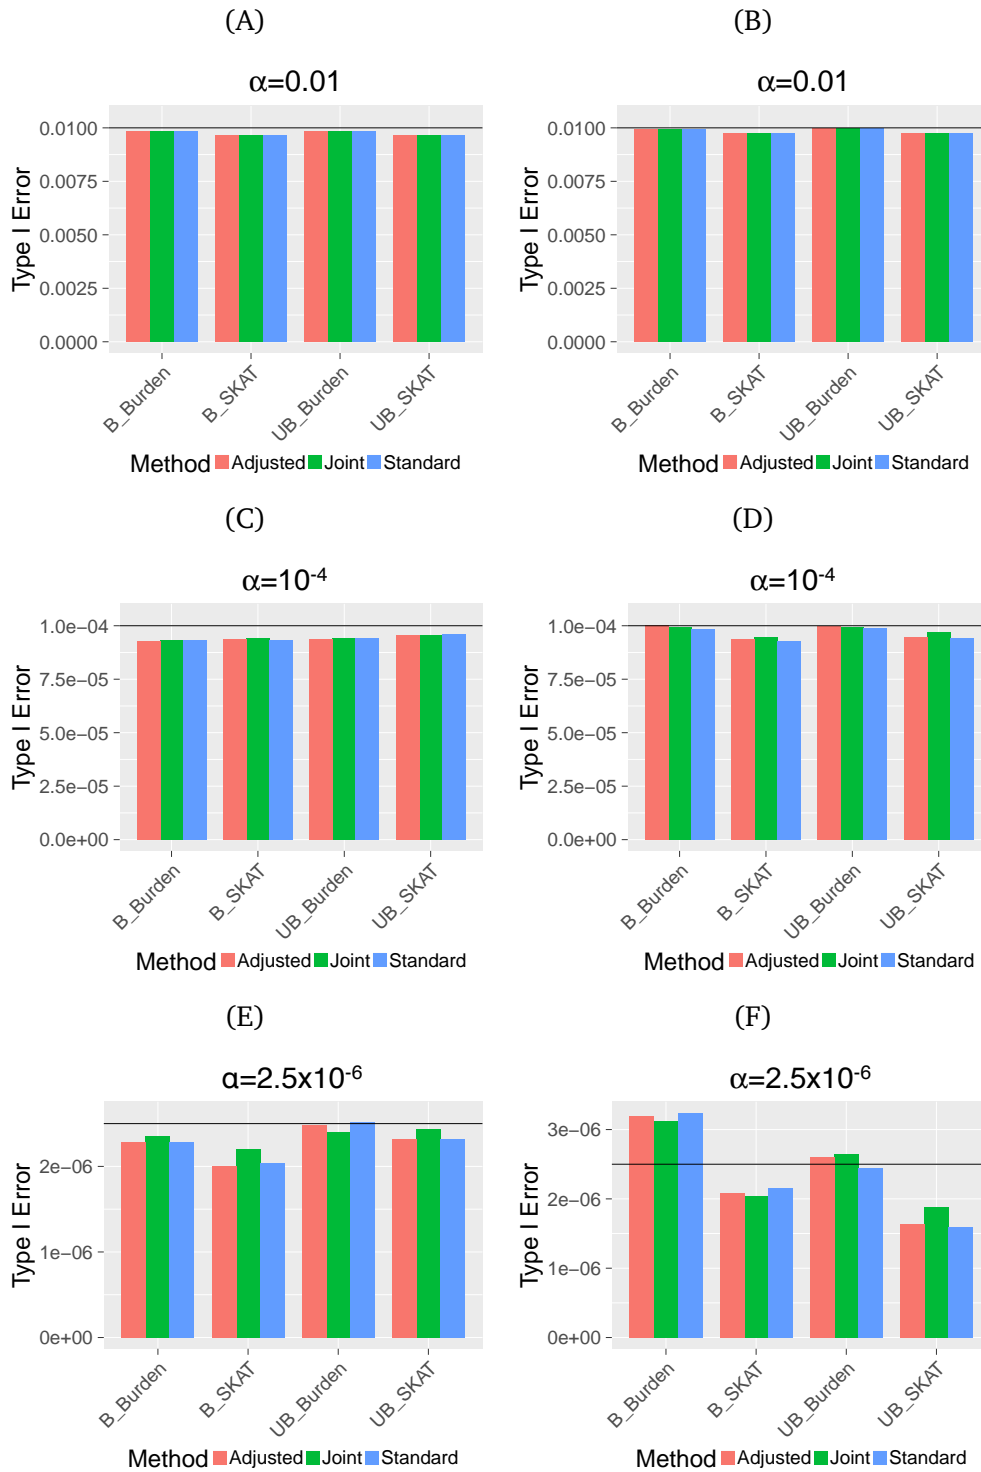

(A, C, E): Common covariates; (B, D, F) Different covariates.

**Figure S 4:** Empirical type I errors of meta-Burden test and meta-SKAT with different significance levels ( $\alpha = 0.01, 10^{-4}$ ), for balanced (B) and unbalanced (UB) **dichotomous** studies with common covariates and population stratifications.

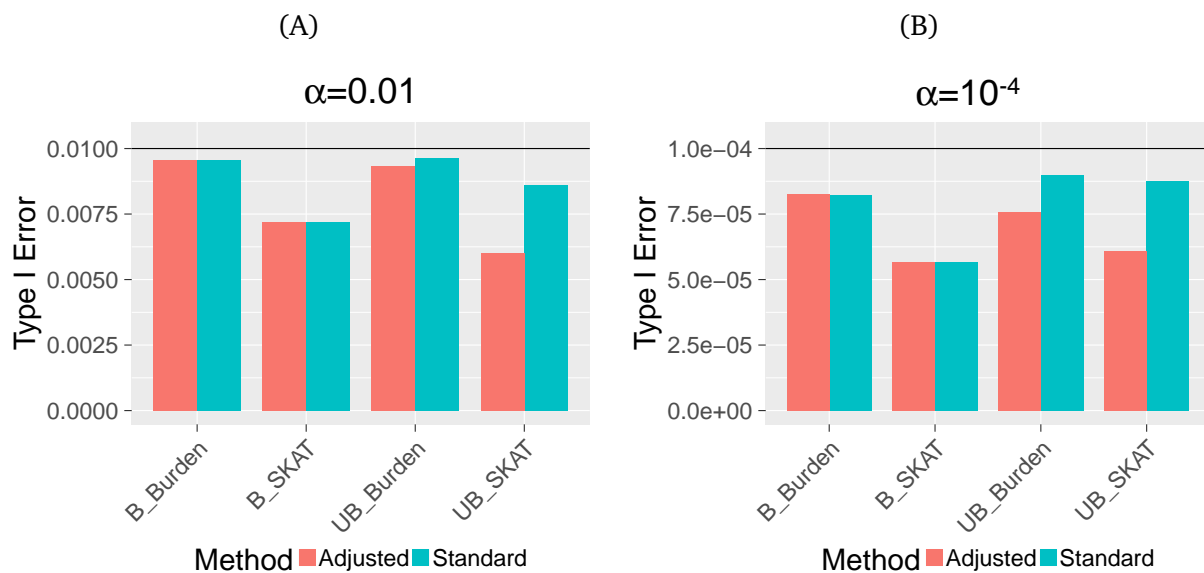

**Figure S 5:** Quantile-Quantile (QQ) plots of  $-\log_{10}(p)$  values of meta-Burden test and meta-SKAT, for null simulations with multi-ethnic samples and unbalanced settings, along with the genomic control factors ( $\lambda_{GC}$ ).

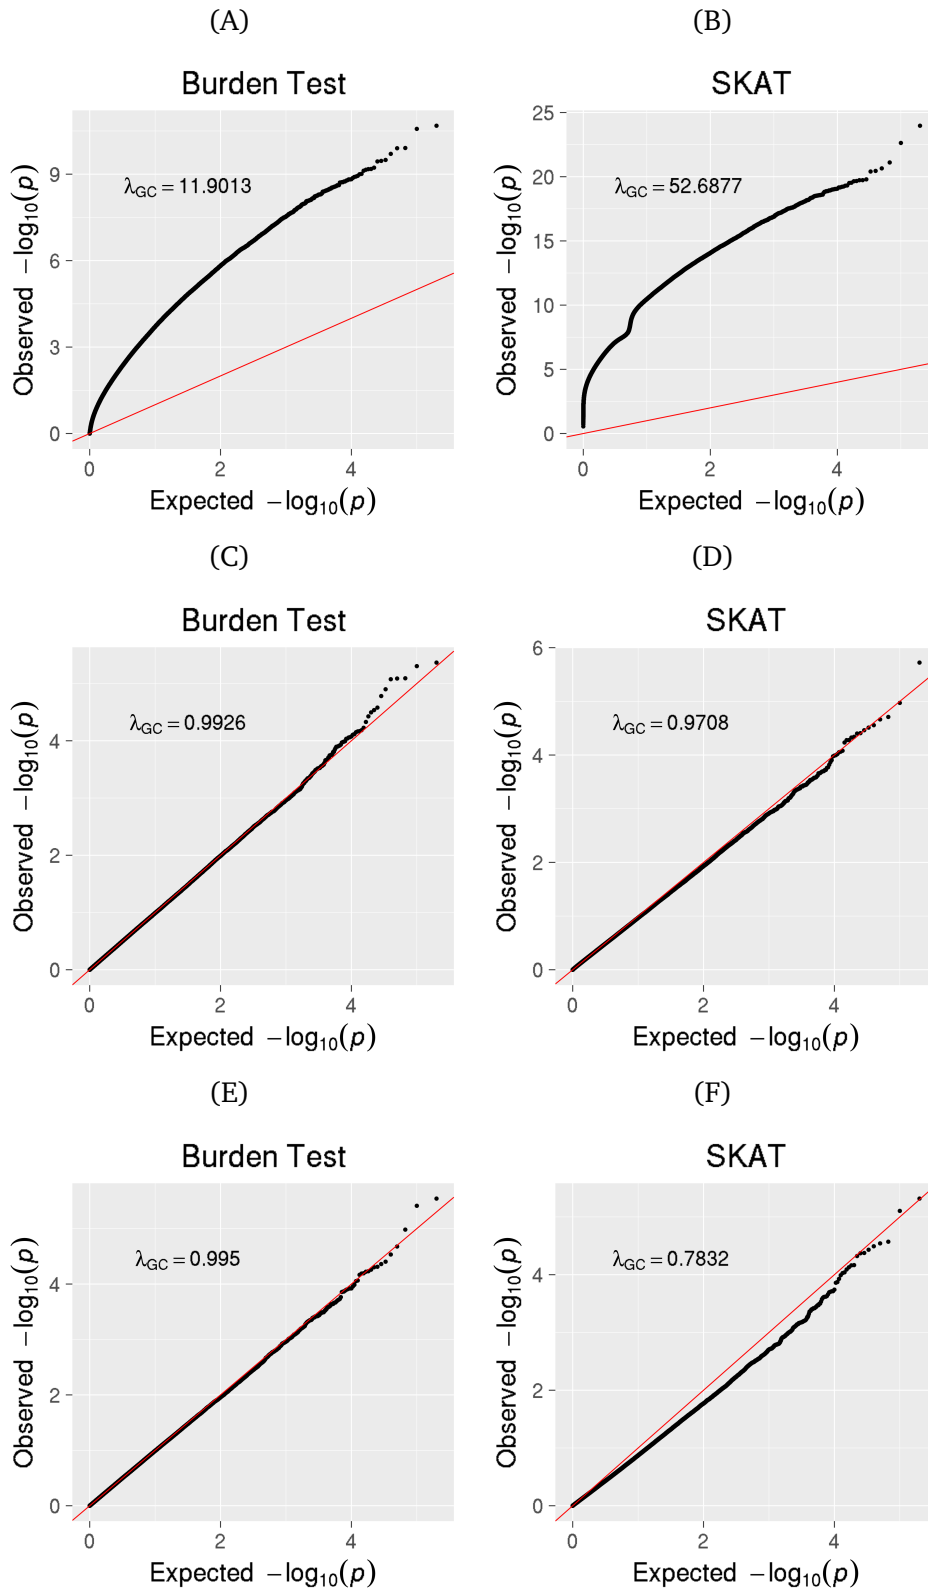

(A, B) Joint analysis with first 4 PCs as additional covariates; (C, D) Standard methods; (E, F) Our adjusted methods.

**Figure S 6:** Score statistic estimates in the **dichotomous** studies under balanced and unbalanced settings, with **different** covariates, without population stratification.

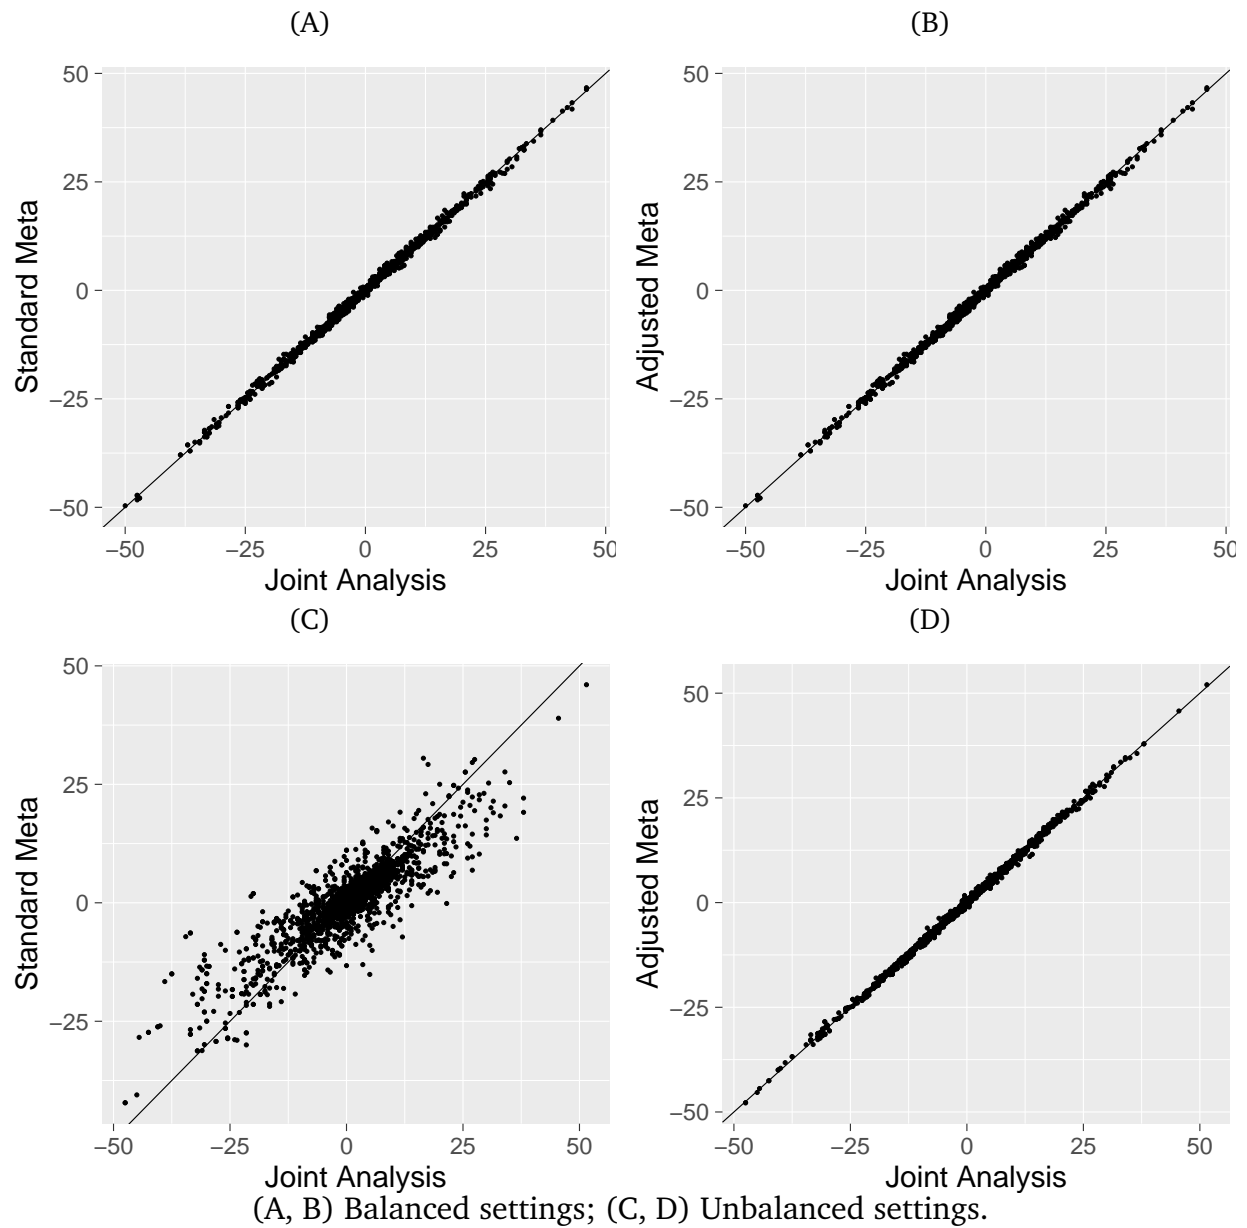

**Figure S 7:**  $-\log_{10}(\text{p values})$  of single-variant score tests in the **dichotomous** studies with **different** covariates, without population stratification.

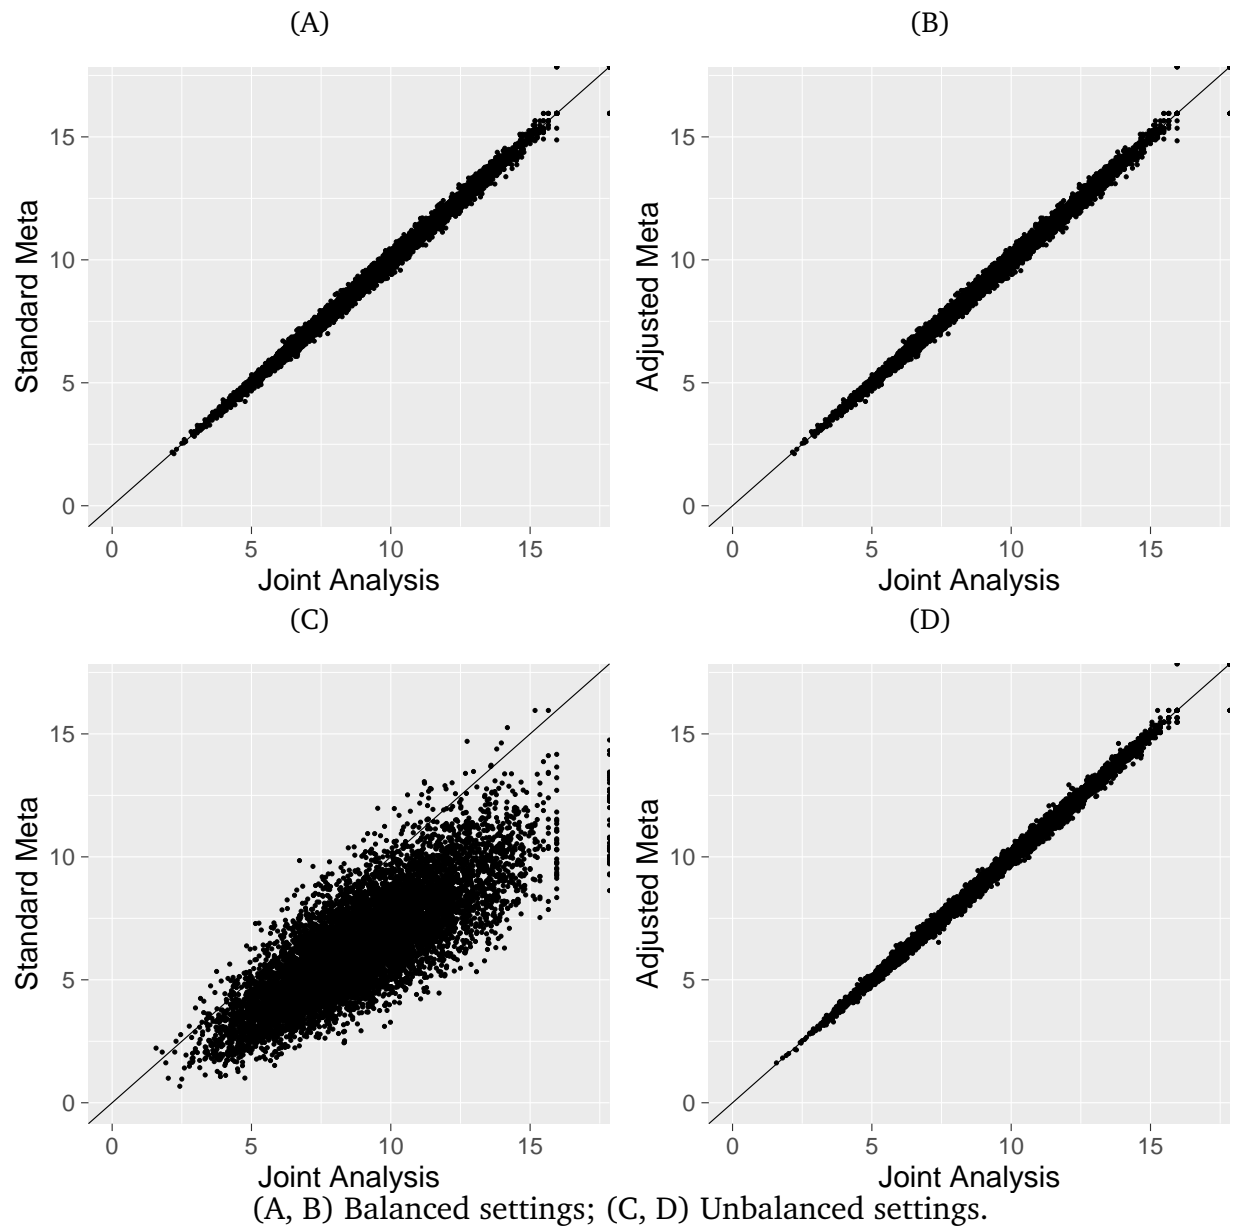

**Figure S 8:** Power comparison for balanced (B) and unbalanced (UB) **dichotomous** studies with **different** covariates, without population stratification.

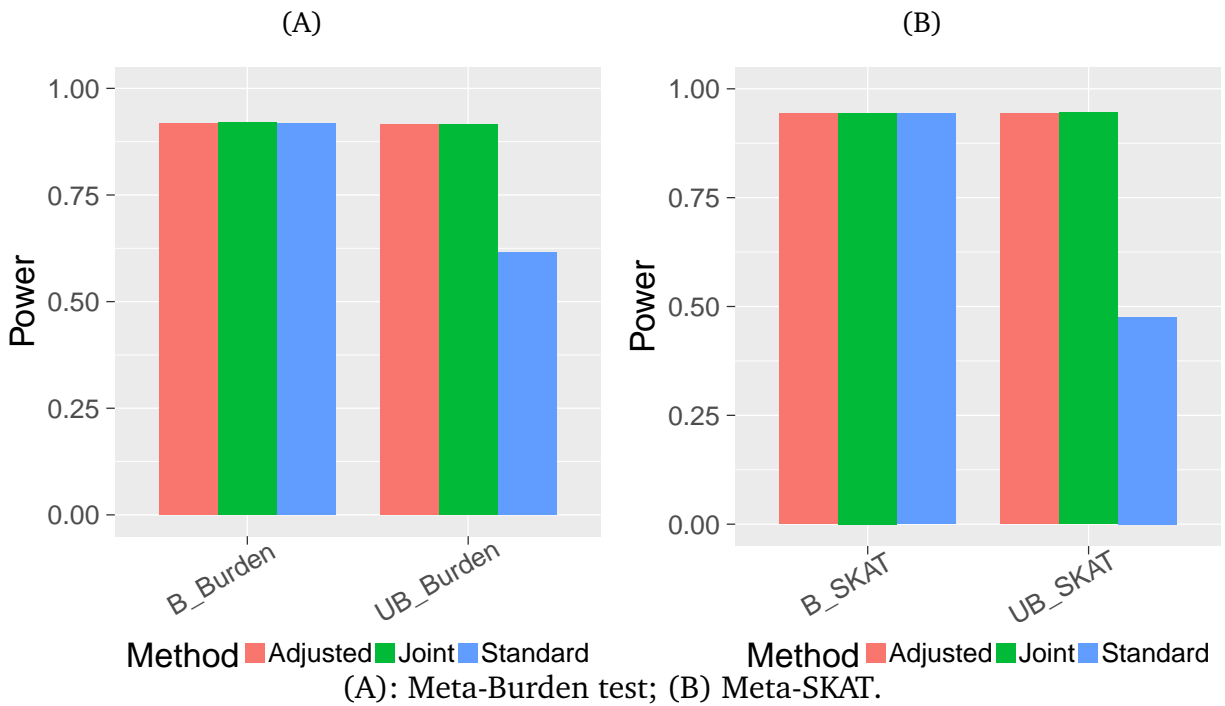



**Figure S 9:** Score statistic estimates in the **quantitative** studies under balanced and unbalanced settings, with **common** covariates, without population stratification.

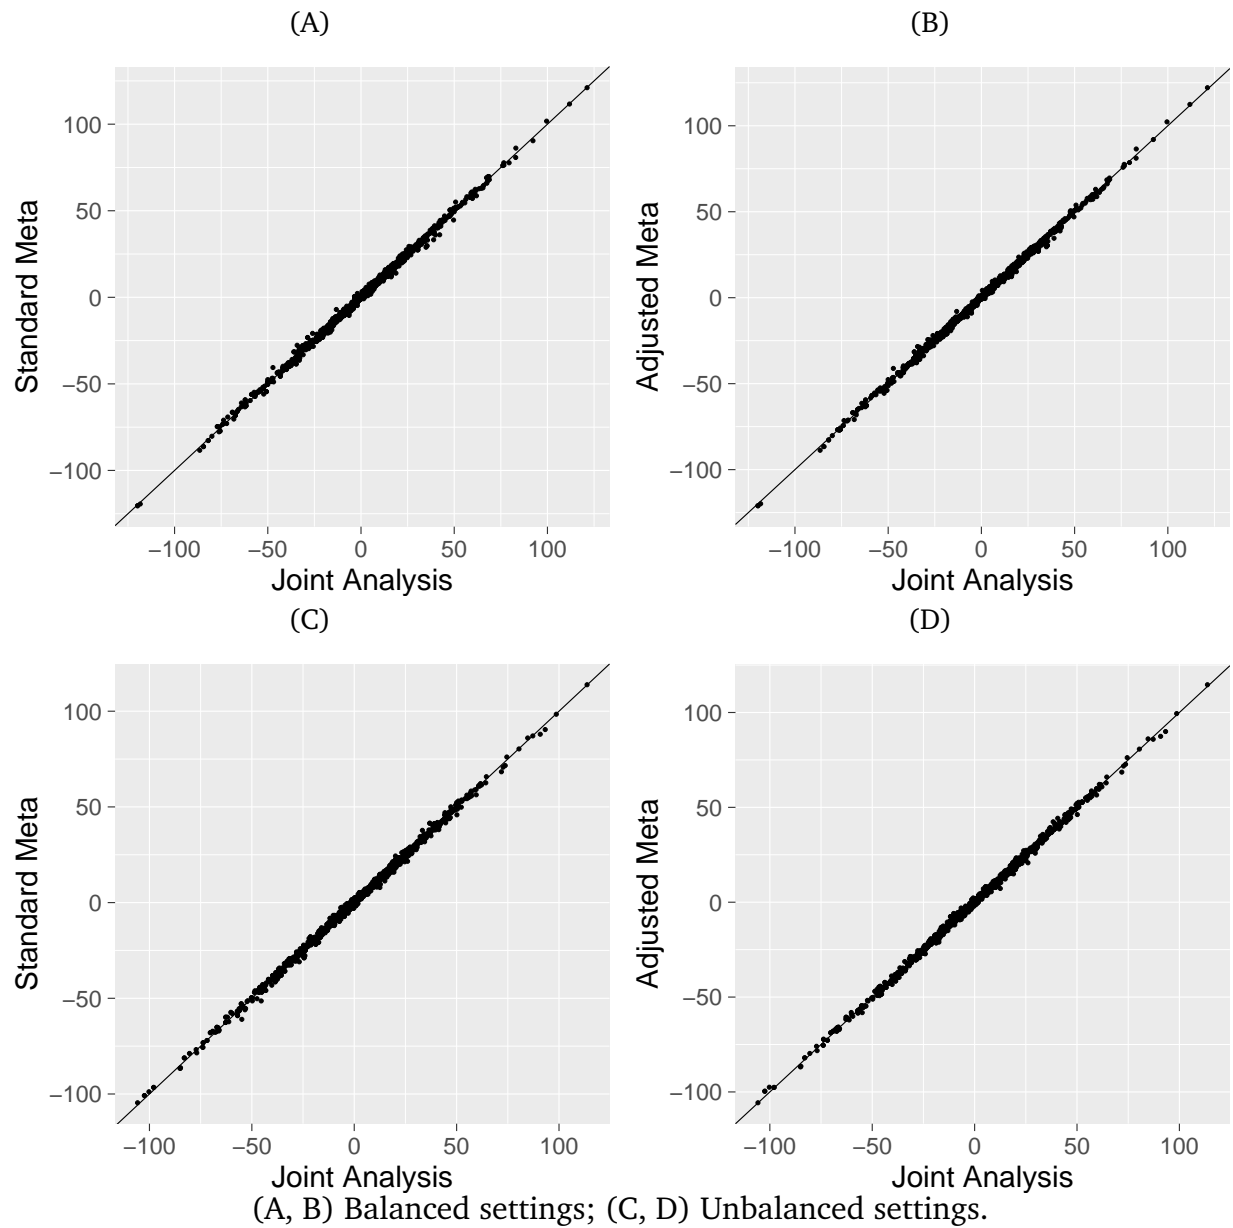

**Figure S 10:**  $-\log_{10}$ (p values) of single-variant score tests in the **quantitative** studies with **common** covariates, without population stratification.

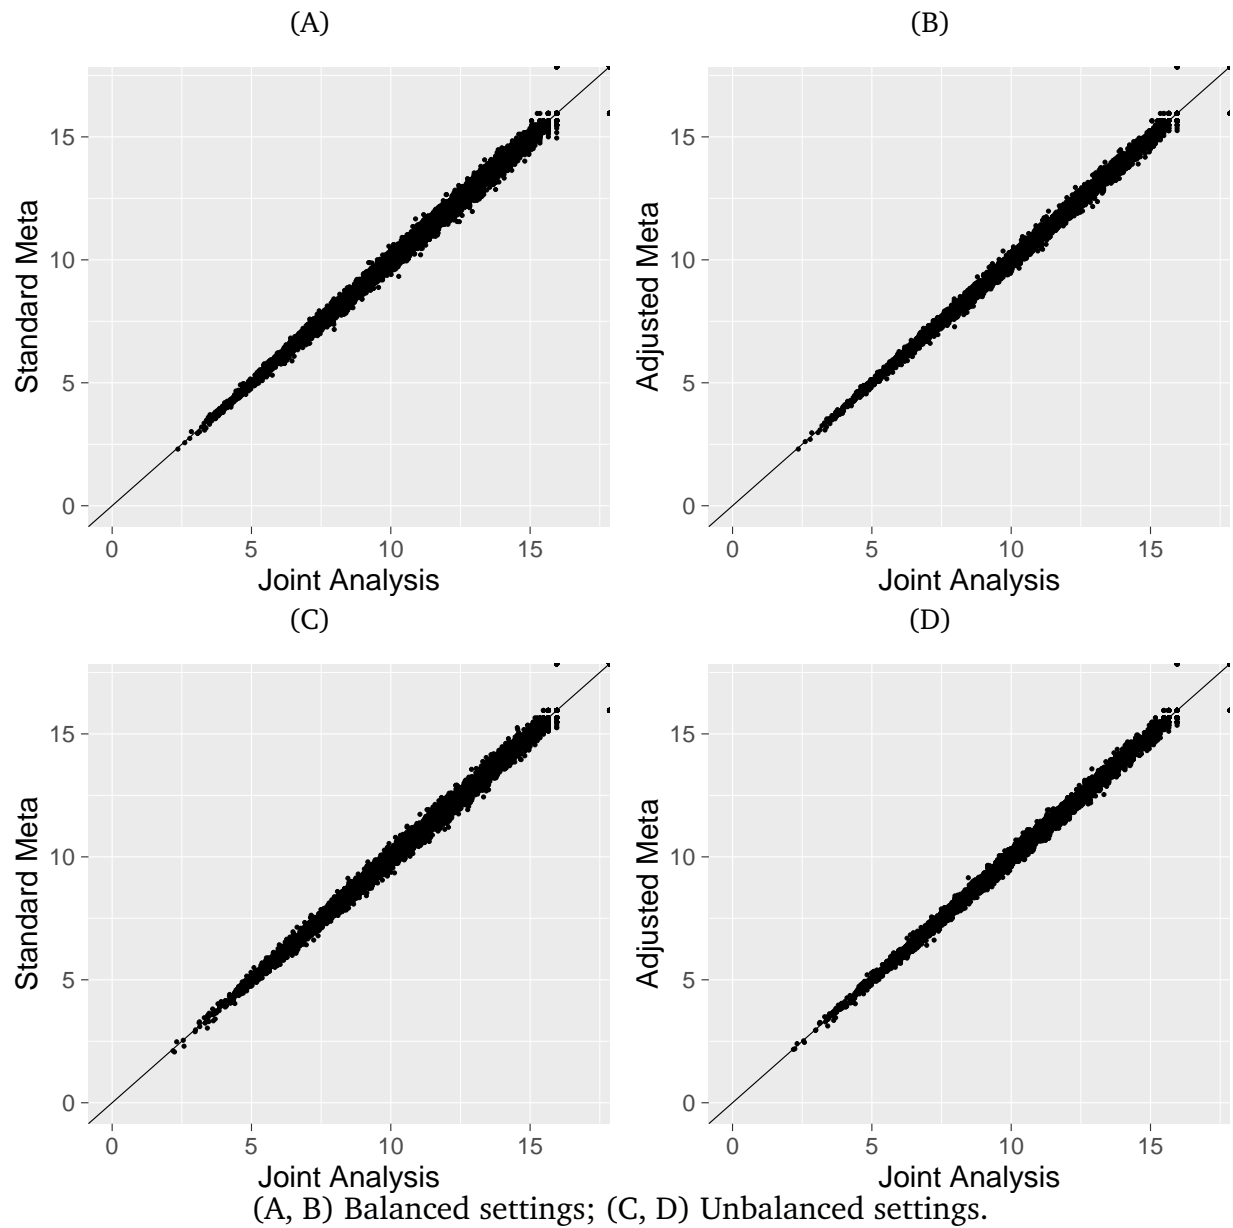

**Figure S 11:** Score statistic estimates in the **quantitative** studies under balanced and unbalanced settings, with **different** covariates, without population stratification.

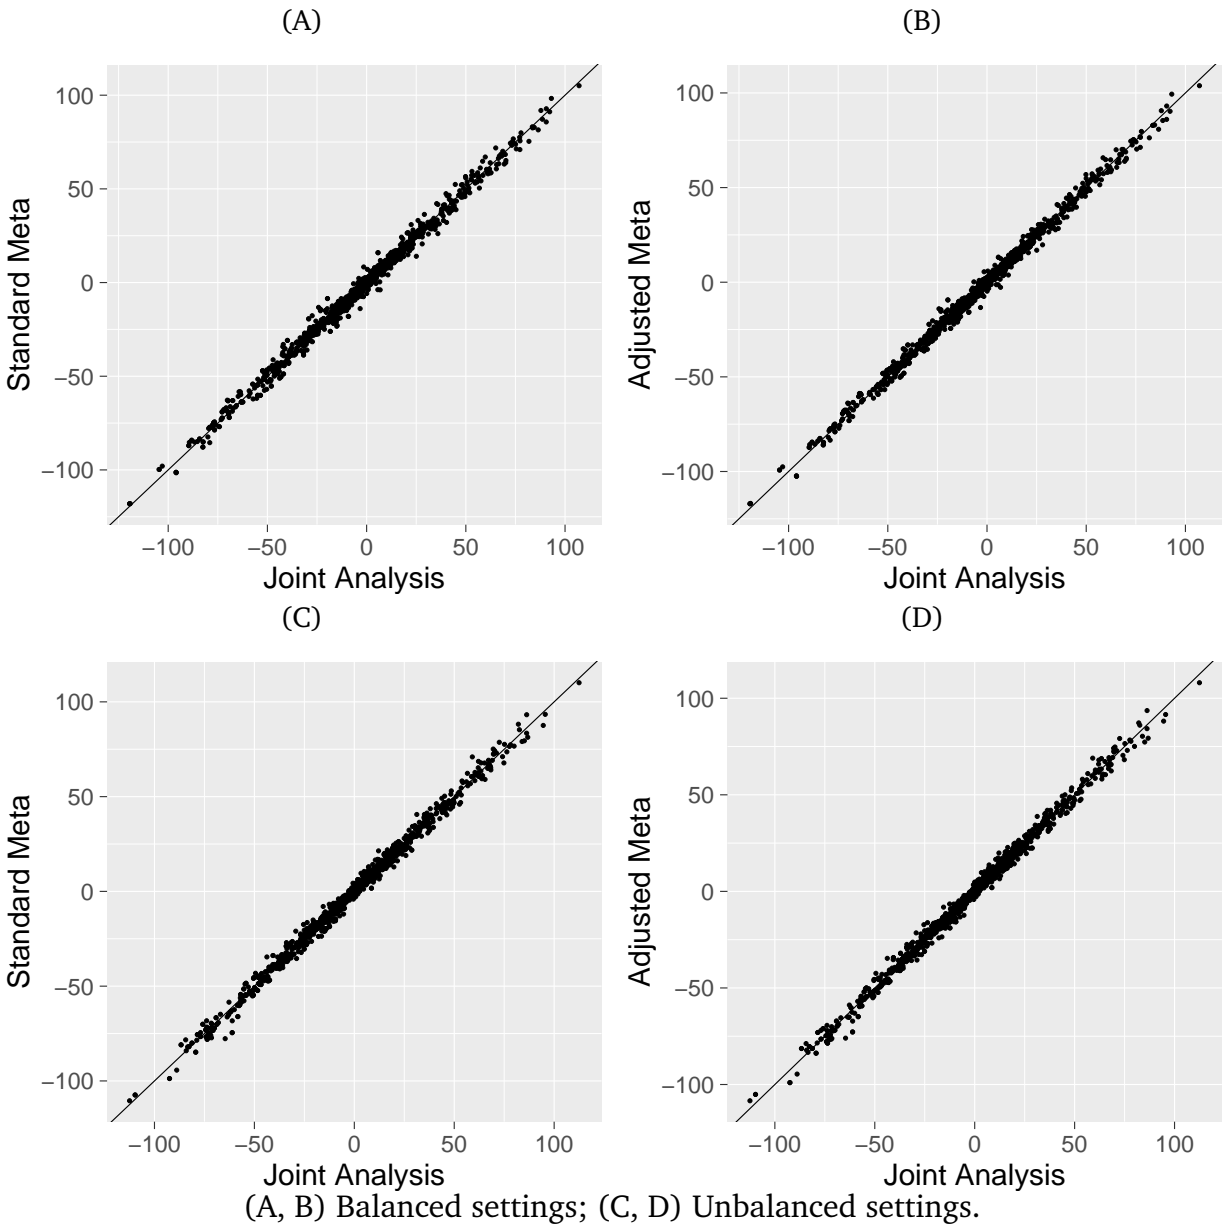

**Figure S 12:**  $-\log_{10}$ (p values) of single-variant score tests in the **quantitative** studies with **different** covariates, without population stratification.

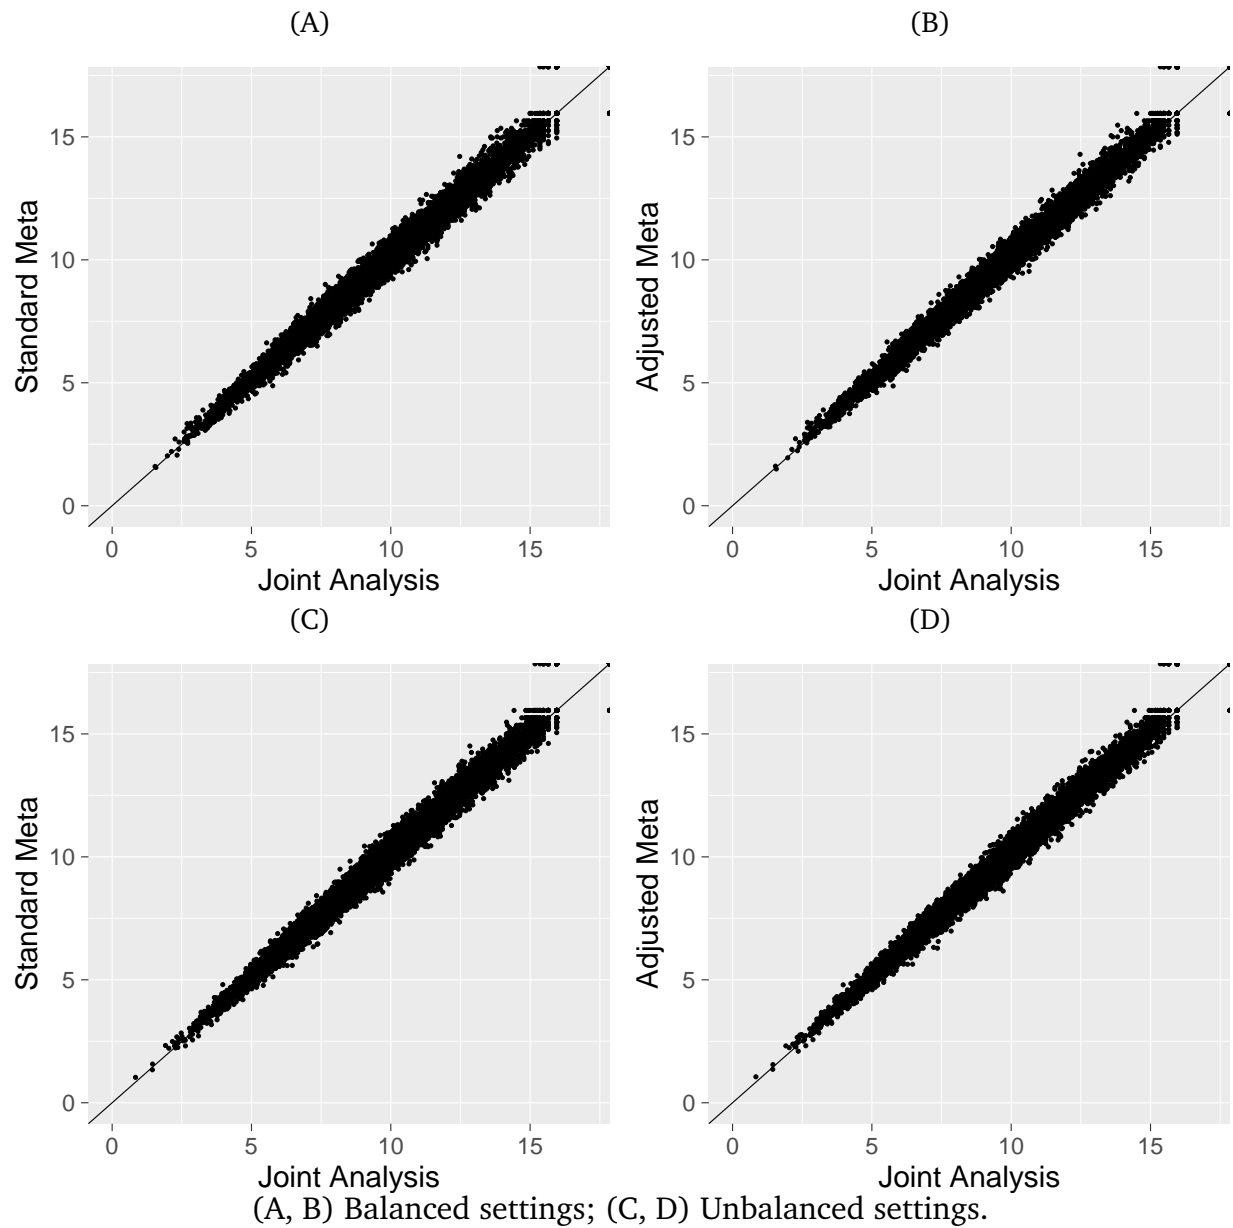

**Figure S 13:** Power comparison of meta-Burden test and meta-SKAT for balanced (B) and unbalanced (UB) **quantitative** studies without population stratification.

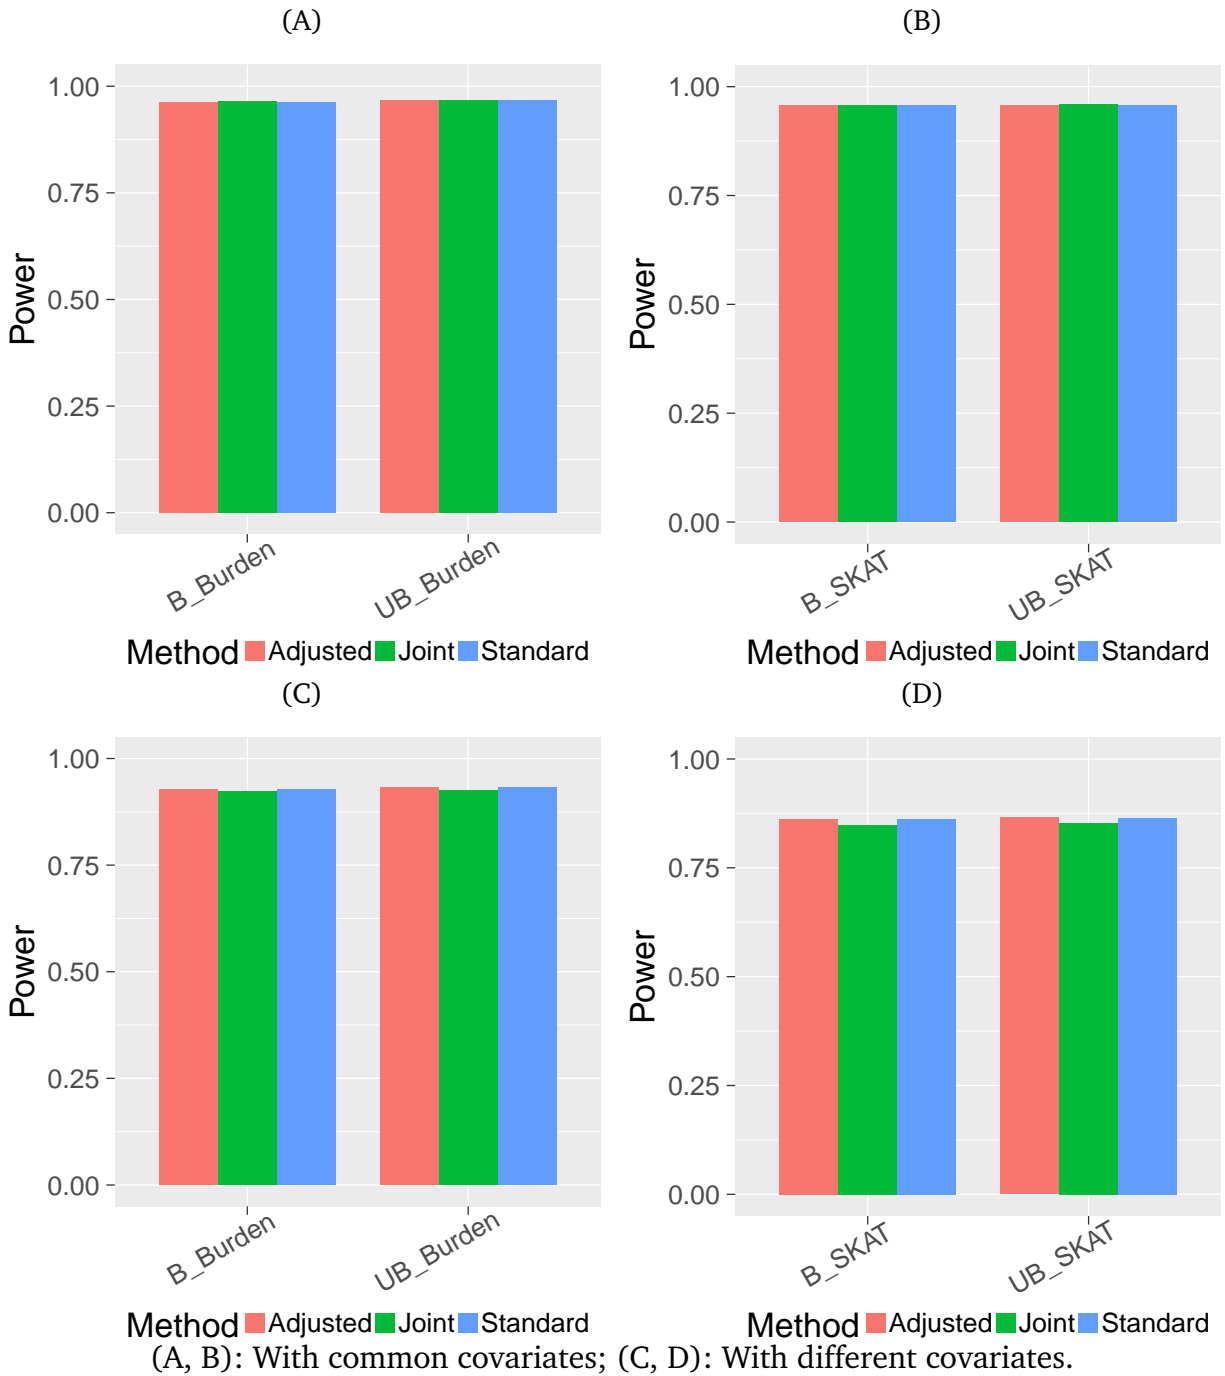

**Figure S 14:** Empirical type I errors of meta-Burden test and meta-SKAT with different significance levels ( $\alpha = 0.01, 10^{-4}, 2.5 \times 10^{-6}$ ), for permuted multi-ethnic AMD data.

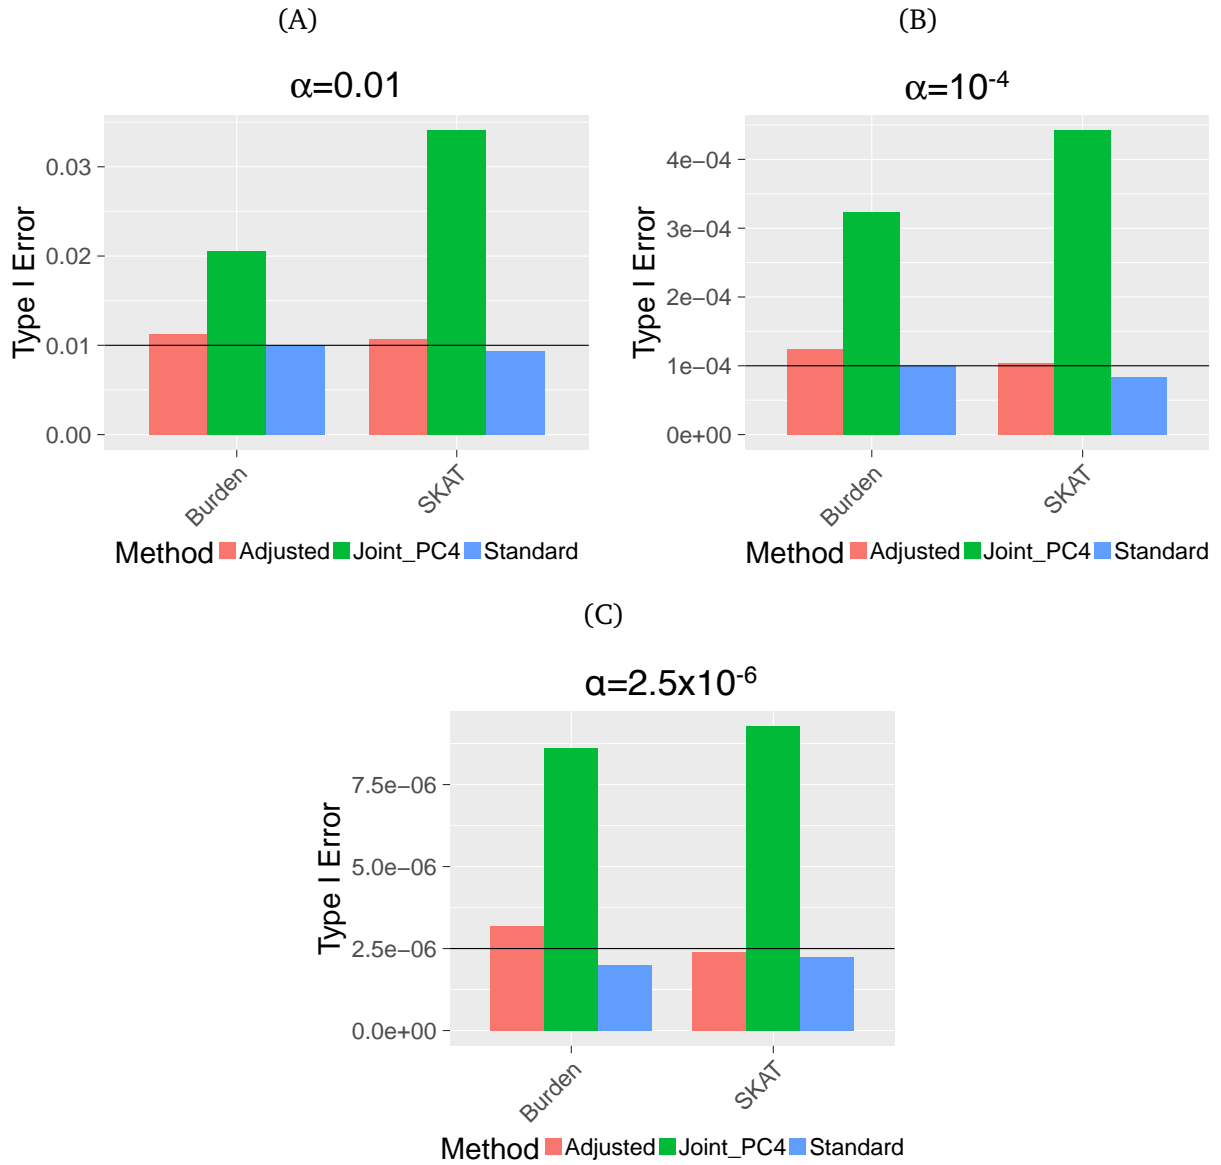

**Figure S 15:** Histograms of the type 2 diabetes phenotypes that were jointly corrected for age, gender, BMI, and first four joint PCs.

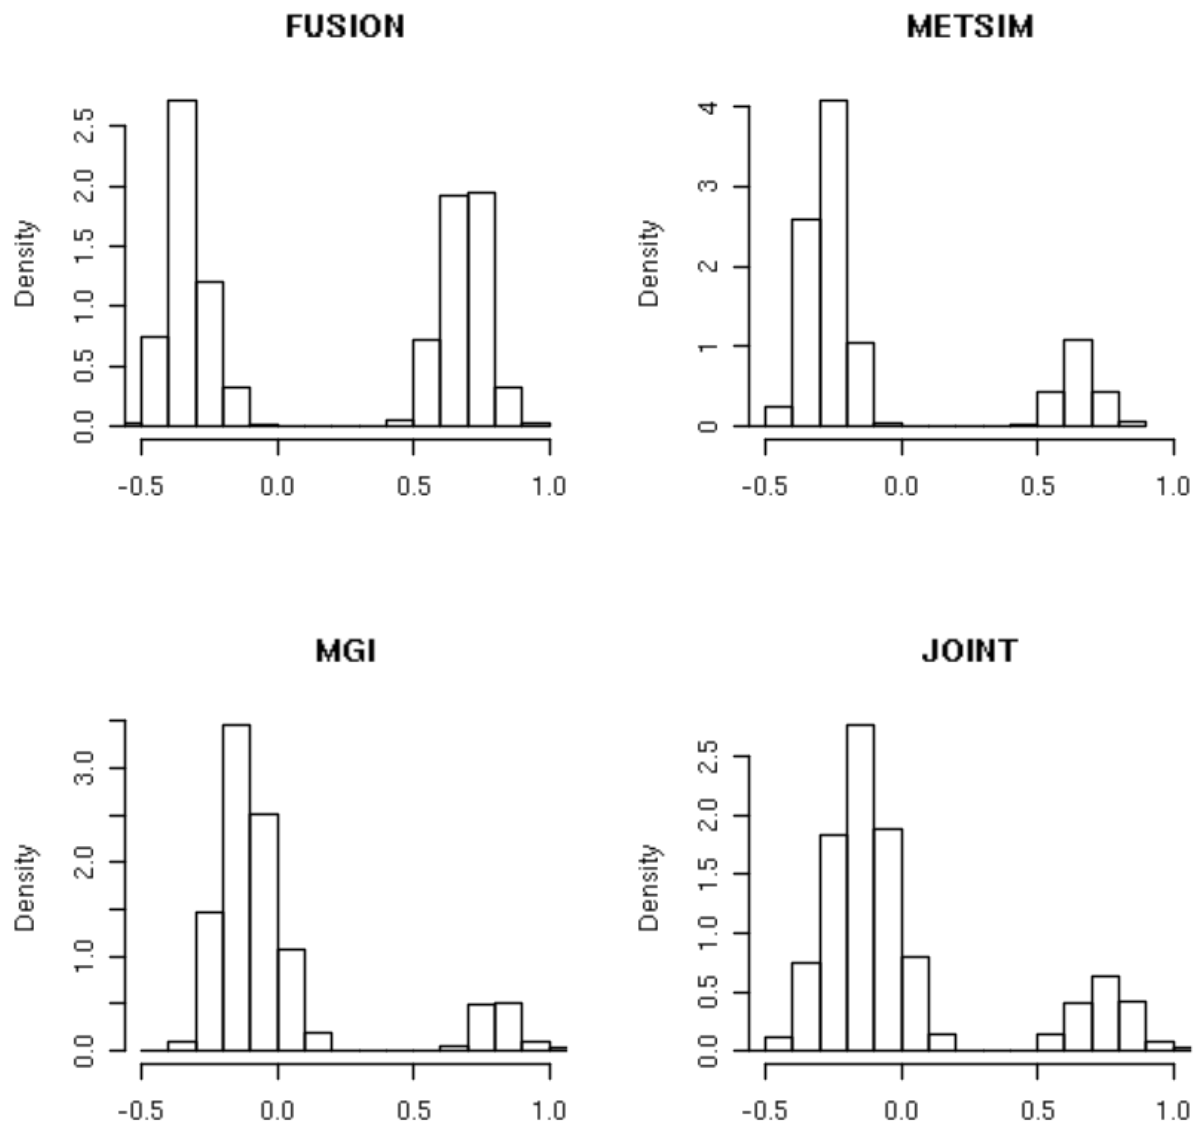

**Figure S 16:** First two joint PCs of type 2 diabetes GWASs.

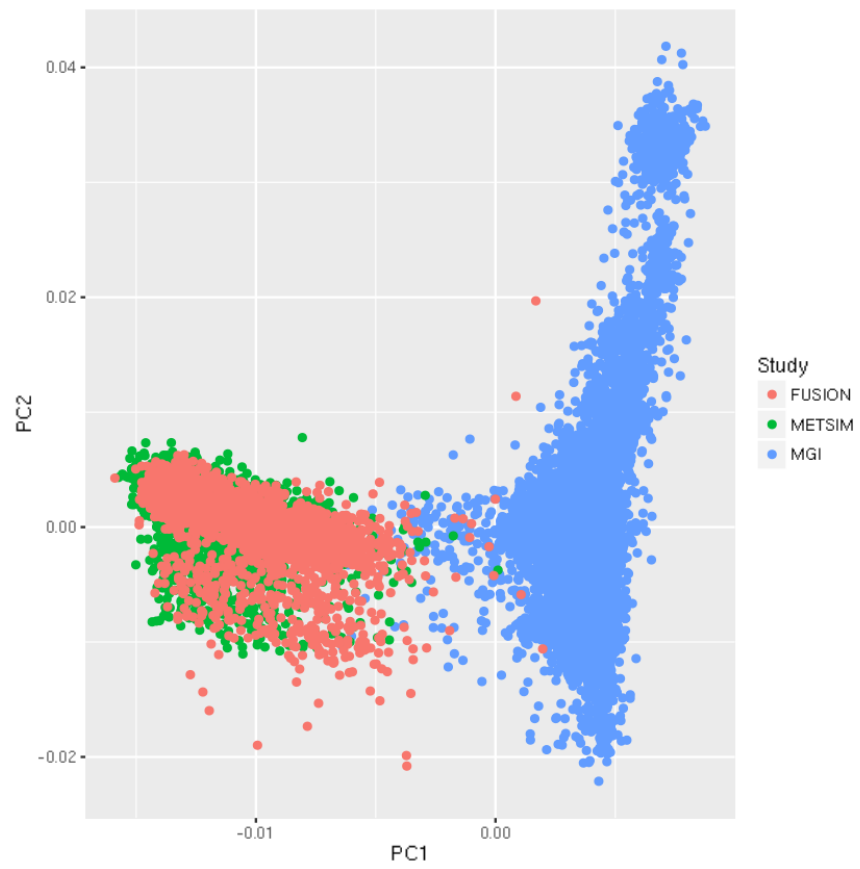



**Figure S 17:** Manhattan plots of the individual GWASs of type 2 diabetes.

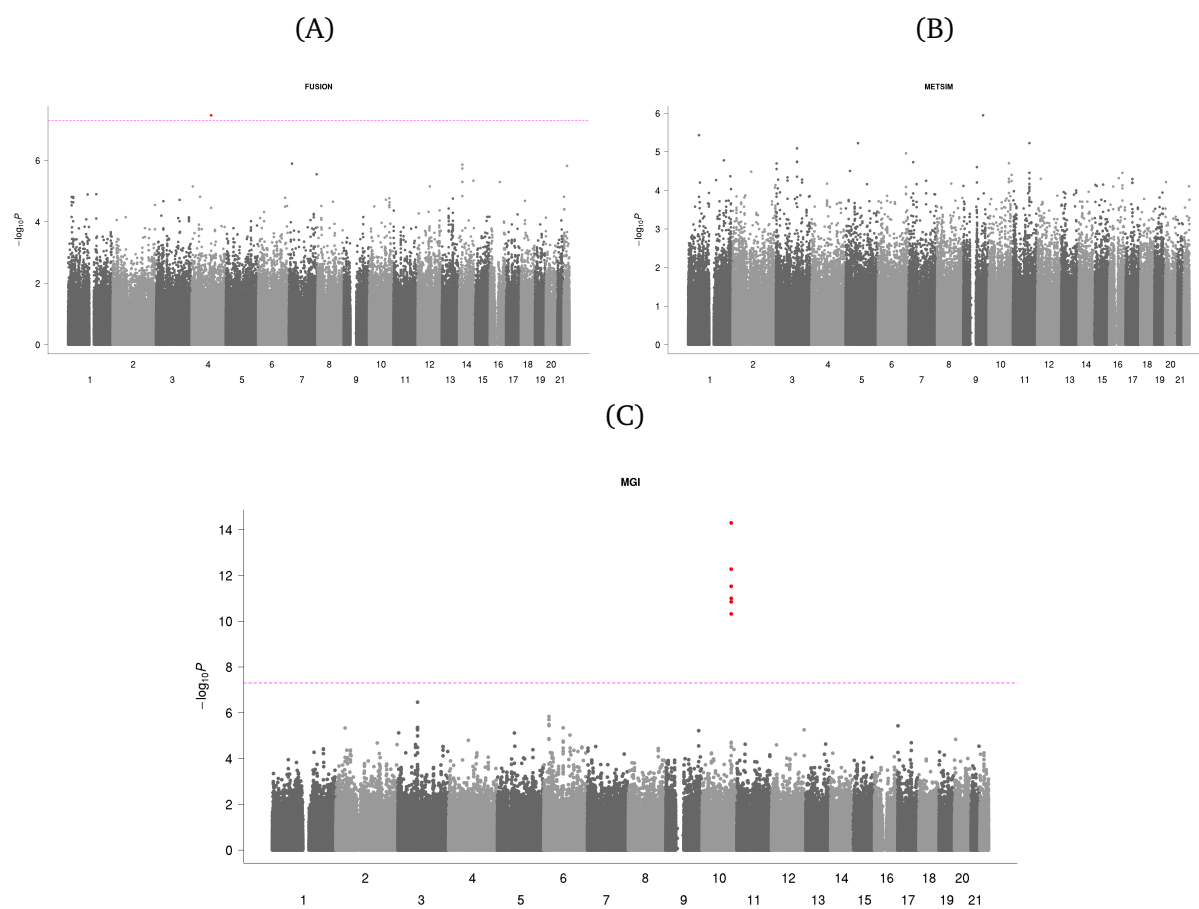

Figure S 18: QQ plots of  $-\log_{10}(p \text{ values})$  by single-variant score tests of type 2 diabetes GWASs.

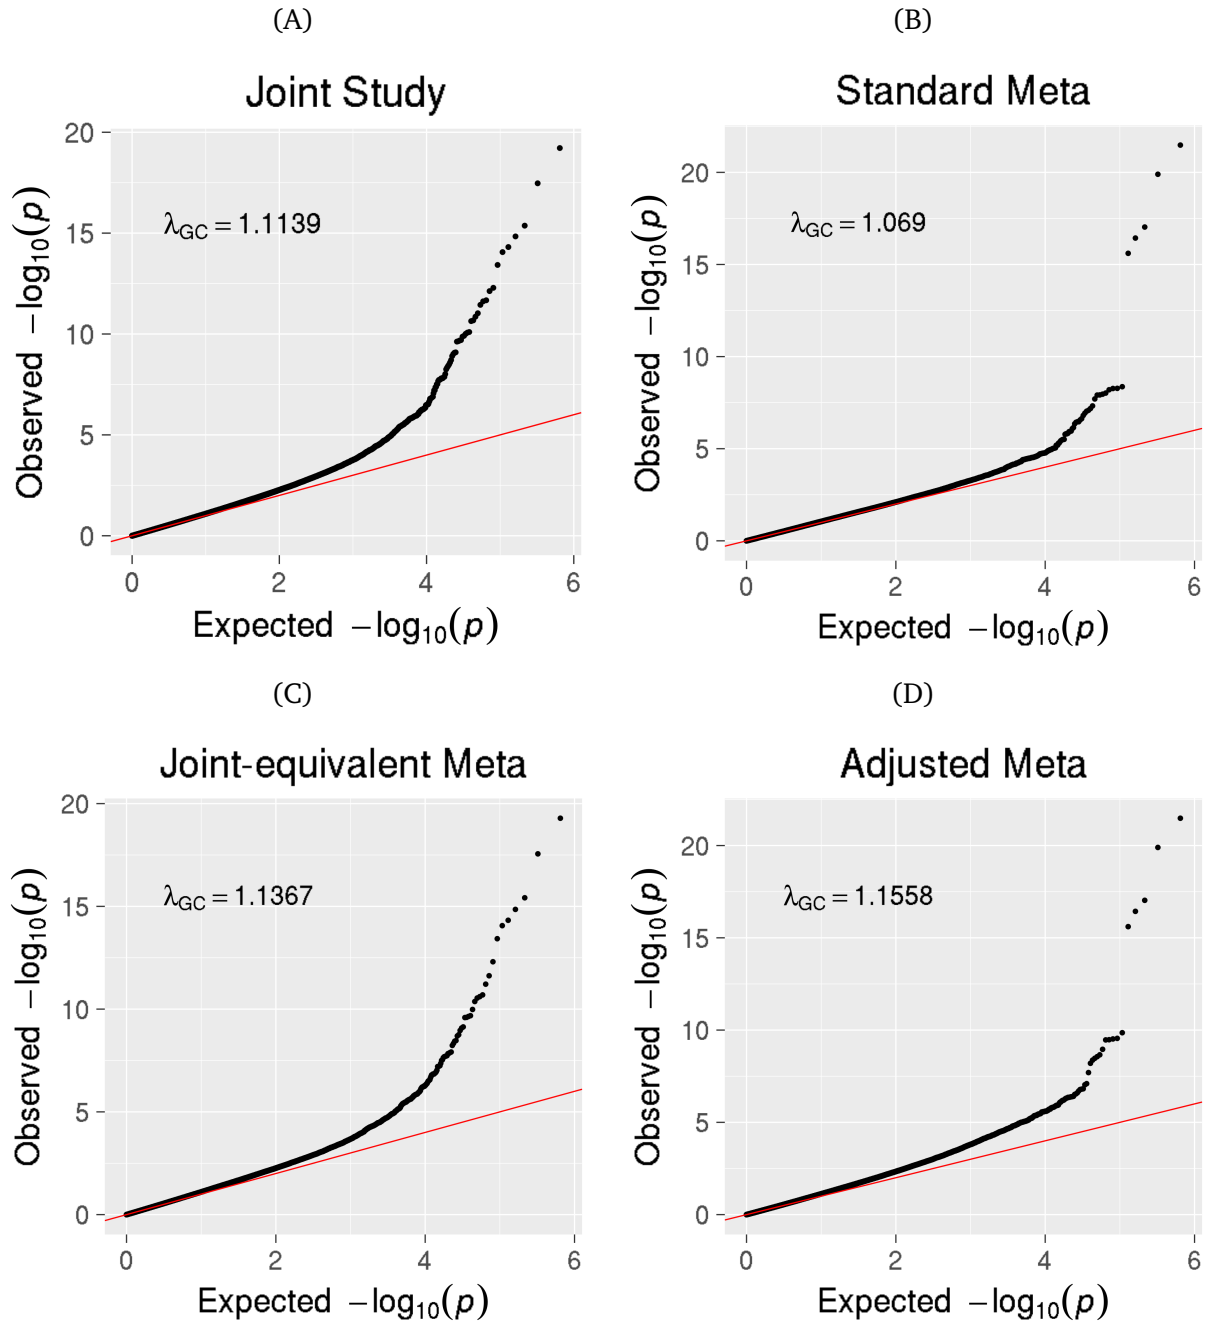

**Figure S 19:** Compare the MAFs in three individual GWASs for the genome-wide significant variants by joint analysis.

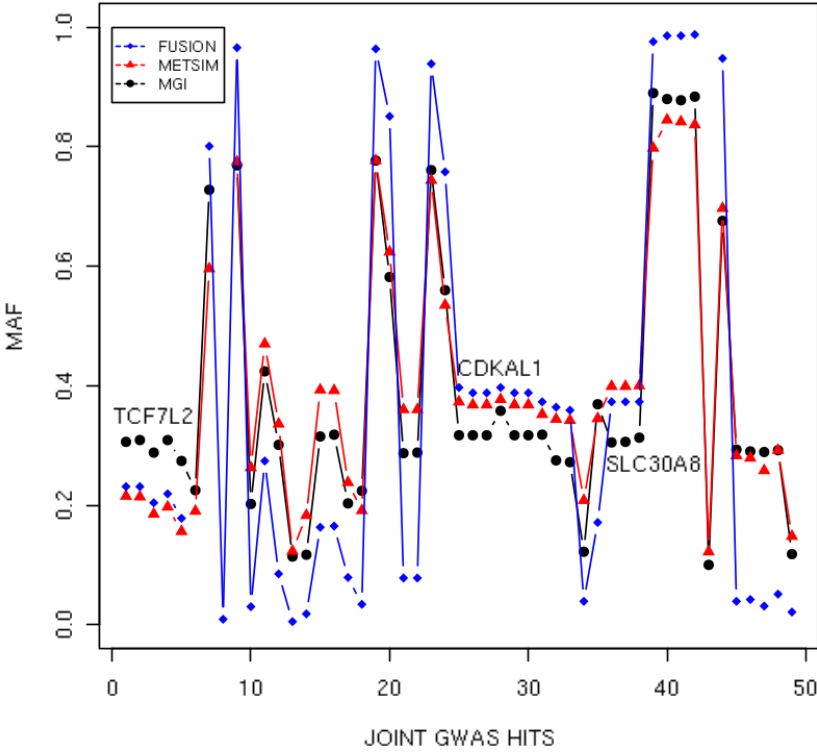

Supplement: Supplementary file [file 195545-2.pdf]
